# Supplementary material for: Feasibility and reference values of left atrial longitudinal strain imaging by two-dimensional speckle tracking
Source: Springer Nature journal article supplement (doi:10.1186/1476-7120-7-6), 2009-02-08

2008/11/25-14:36:23

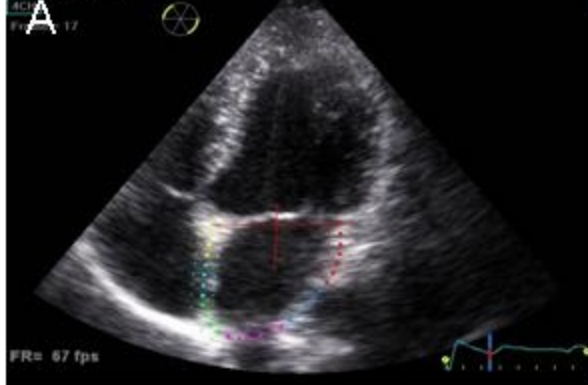

2008/11/25-14:36:23

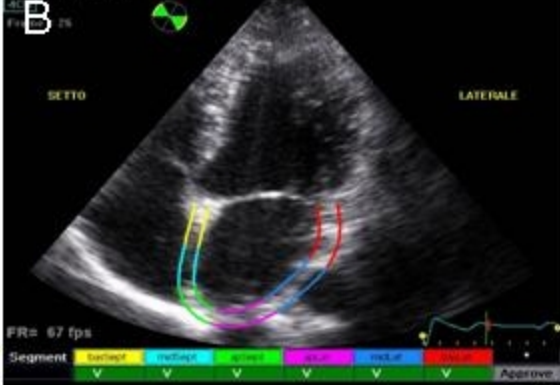

2008/11/25-14:36:23

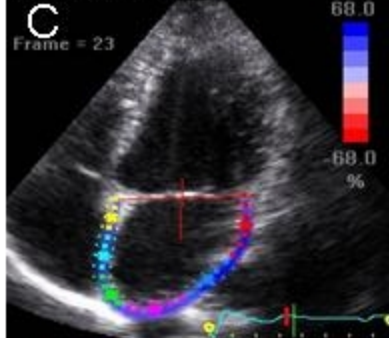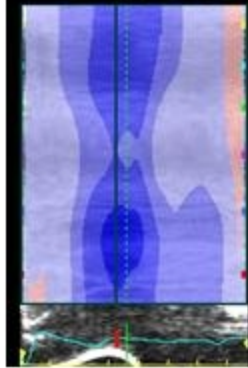

LOCALE: Strain Longitudinale (%) = 44.63 T=329 msec

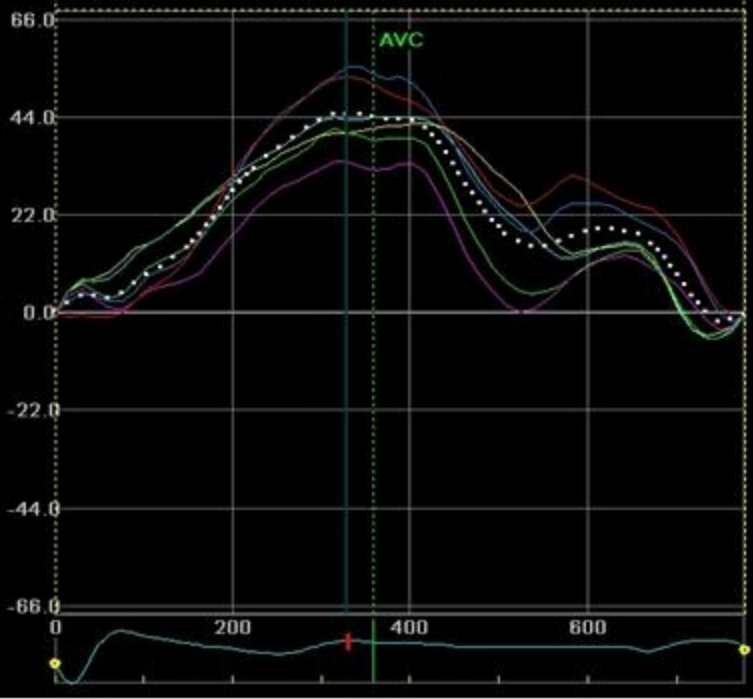

Supplement: 12947_2008_253_MOESM2_ESM.pdf [file 12947_2008_253_MOESM2_ESM.pdf]
